# Supplementary material for: Biomarker-derived fast-and-frugal decision tree for preemption of veno-occlusive disease/sinusoidal obstructive syndrome
Source: PubMed Central journal article supplement — Blood Adv. 2024 Sep 1;8(20):5426–9. doi: 10.1182/bloodadvances.2024013670 (PMC11526061; doi:10.1182/bloodadvances.2024013670), 2024-09-01

## Supplemental material to

### Biomarker-derived Fast-and-frugal decision tree for preemption of Venous thromboembolism Disease/Sinusoidal obstructive syndrome

**Supplemental Table 1.** Comparison of fast-and-frugal decision trees (FFT) without and with thresholds (FFTT)

|      | <b>FFT(11) with threshold</b> | <b>FFT(11) w/o threshold</b> |
|------|-------------------------------|------------------------------|
| Sens | 0.8000 [ 0.7686, 0.8314]      | 0.8000 [ 0.7686, 0.8314]     |
| Spec | 0.7286 [ 0.7230, 0.7341]      | 0.7286 [ 0.7230, 0.7341]     |
| PPV  | 0.2963                        | 0.2963                       |
| NPV  | 0.9623                        | 0.9623                       |
| FA   | 0.2714 [ 0.2659, 0.2770]      | 0.2714 [ 0.2659, 0.2770]     |
| LR+  | 2.9474 [ 1.7997, 4.8270]      | 2.9474 [ 1.7997, 4.8270]     |
| LR-  | 0.2745 [ 0.0788, 0.9561]      | 0.2745 [ 0.0788, 0.9561]     |
| A'   | 0.8466                        | 0.8466                       |
| B''  | -0.1055                       | -0.1055                      |
| c    | -0.1166 [-0.1518, -0.0813]    | -0.1166 [-0.1518, -0.0813]   |
| d'   | 1.4501 [-0.8788, 3.7790]      | 1.4501 [-0.8788, 3.7790]     |
| mcu  | 2.6375 (speed)                | 2.6375 (speed)               |
| pci  | 0.1208 (frugality)            | 0.1208 (frugality)           |

#### Abbreviations:

Sens- sensitivity; Spec- specificity; PPV- positive predictive value; NPV- negative predictive value; FA- false alarms (positives); LR+: likelihood ratio positive; LR-: likelihood ratio negative

d'(discriminability) (a measure the distance between the signal i.e. disease and the noise- the absence of a disease expressed as means in standard deviation units); c(decision criterion) (a defined as the distance between the criterion and the neutral point, where making decisions are consistent with prior probabilities) ; A'- nonparametric measure of d'; B''- nonparametric measure of c; mcu- speed, which

measures mean cues used (mcu), the average number of cue, averaged across all cases, used in making a decision. pci: frugality, a measure of percent cues ignored (pci), defined as (1-mcu) divided by the total number of cues in the dataset (i.e., the maximum possible mcu value)

**Supplemental Table 2.** SOSy/n model vs FFT classification performance

| SOS2Cat | Rx_FFT    |           | Total     |
|---------|-----------|-----------|-----------|
|         | 0         | 1         |           |
| 0       | <b>53</b> | <b>0</b>  | <b>53</b> |
| 1       | <b>0</b>  | <b>27</b> | <b>27</b> |
| Total   | <b>53</b> | <b>27</b> | <b>80</b> |

**Supplemental Figure 1. How do FFTs enable the quantification and the assessment of the accuracy of clinical management strategies?**

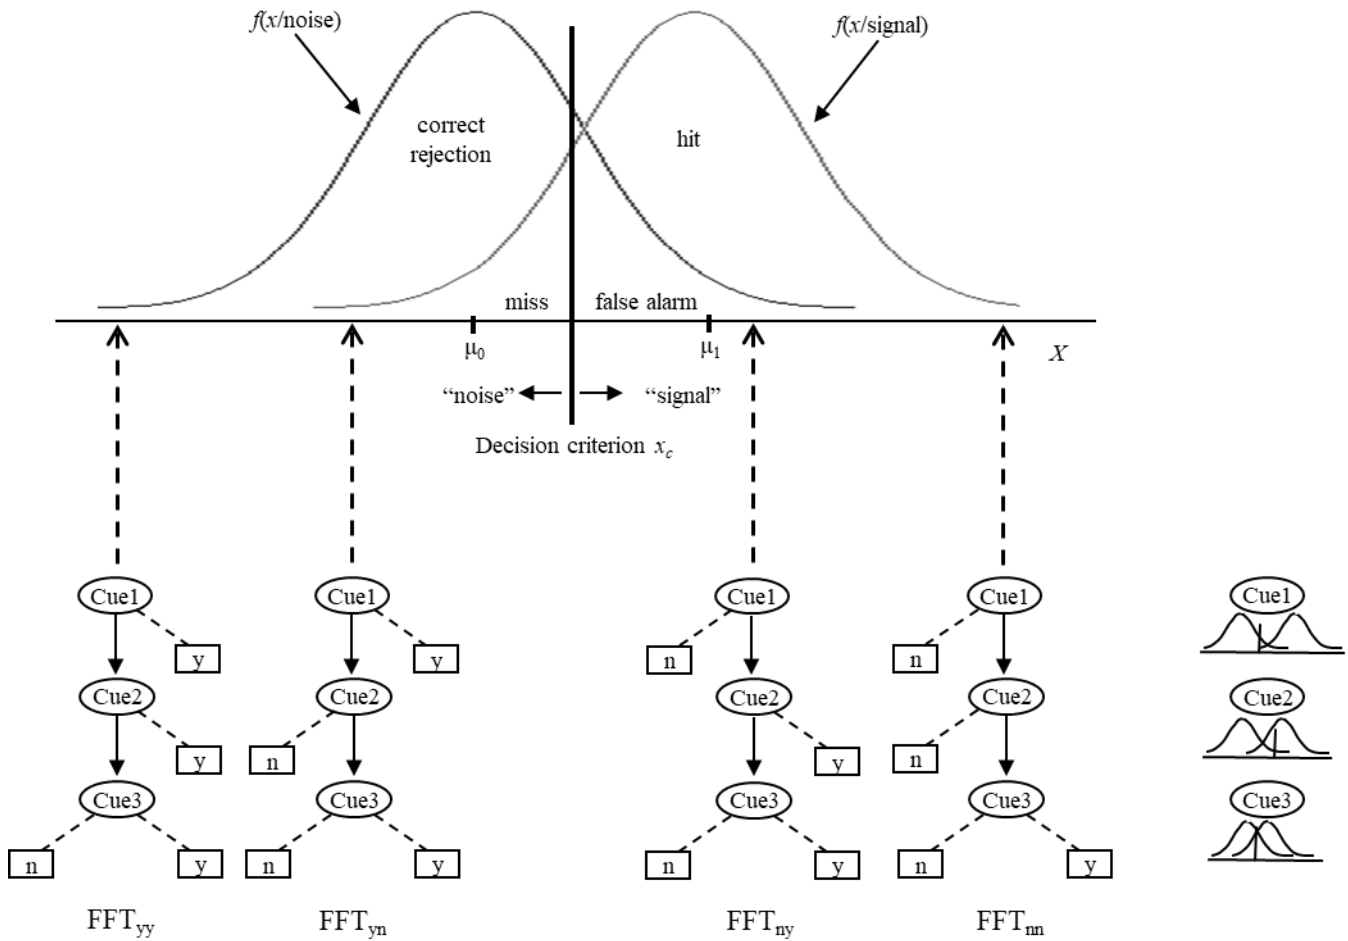

Every cue in a FFT can correctly or incorrectly classify signal and noise. The exit structure (and order of cues) of the FFTs determines its overall classification accuracy. FFT<sub>yy</sub> has a high hit rate (sensitivity) and the expense of large rate of false positives. FFT<sub>yy</sub> maximizes avoidance of false negatives. FF<sub>nn</sub> has low rate of false positives at the expense of a large rate of false negatives. FFT<sub>nn</sub> maximizes avoidance of false positives. FFT<sub>yn</sub> and FFT<sub>ny</sub> have intermediate sensitivities, specificities and predicative classification accuracy.

## Supplemental Figure 2. Categorical FFT analysis

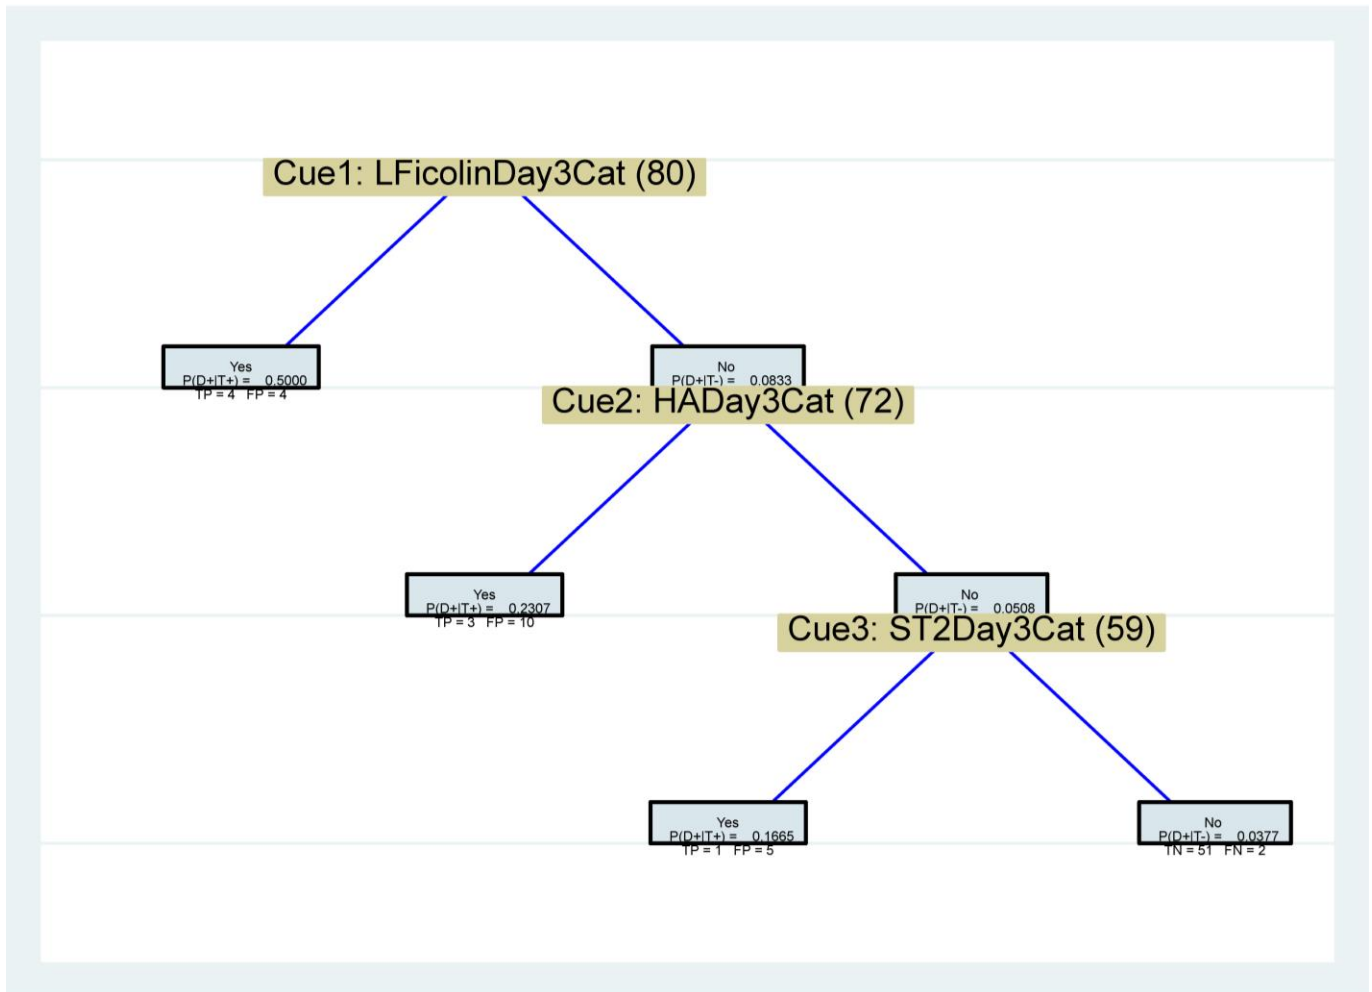

# Supplemental Figure 3. Discrimination and Calibration performance for FFT vs. SOS model (y/n)

## Discrimination

## Calibration

### SOS y/n

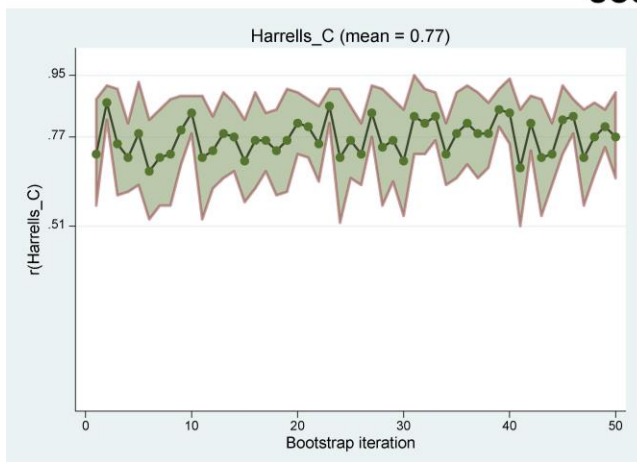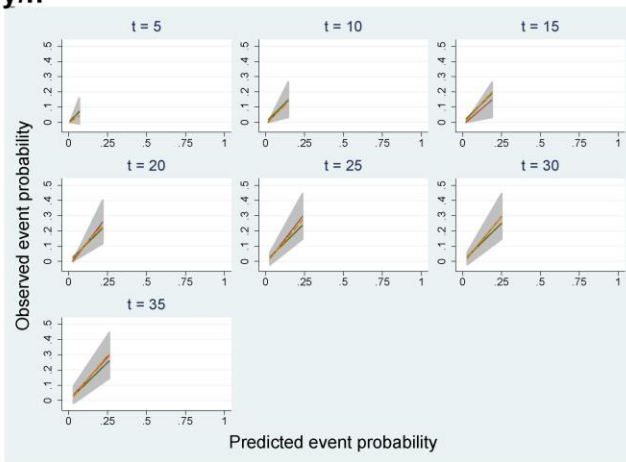

### FFT

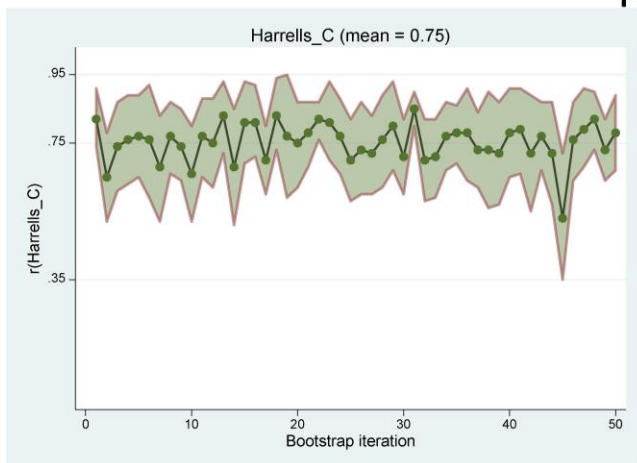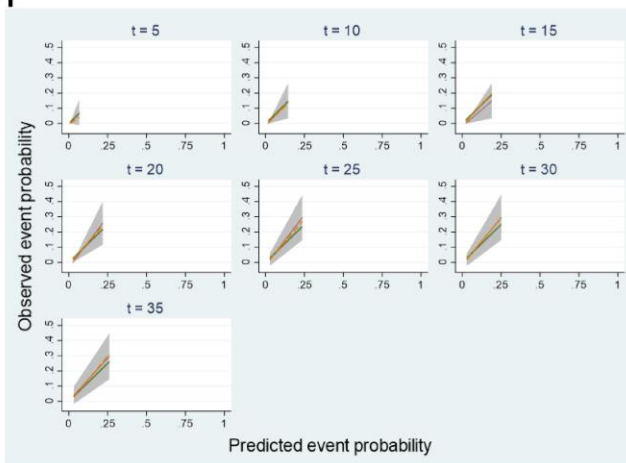

Supplement: BLOODA_ADV-2024-013670-mmc1.pdf [file BLOODA_ADV-2024-013670-mmc1.pdf]
